# Supplementary material
Source: publisher site journal article supplement (https://www.dovepress.com/get_supplementary_file.php?f=382273.docx)
Supplement: Supplementary file 1 [file get_supplementary_file.php]

**SUPPLEMENTARY MATERIALS**

**Appendix 1**. Item specification

| **Constructs** | **Items** | **Statement** |
| --- | --- | --- |
| Locus of Control | LOC1 | I can mostly achieve everything |
| LOC2 | By most cases, luck is the reason of my achievement |
| LOC3 | I do something by the reward aspiration |
| Love of Money | Ach1 | Money represents one's achievement |
| Ach2 | Money is the most important thing in my goal |
| ﻿Evil1 | Money is the root of evil |
| Evil2 | Money is evil |
| Budgt | I use my money carefully |
| Freed1 | Money gives me desirable autonomy |
| Freed2 | Money in the bank is the sign of security |
| Res1 | Money makes me respected in the community |
| Res2 | Money is honourable |
| Res3 | Money expresses my competence and ability |
| Unethical Perception | Unethi1 | My opinion/goal is more important than others' |
| Unethi2 | My personal value is more crucial than publics' |
| Unethi3 | In risky settings, public value can be put aside |
| Unethi4 | The goal can justify the means |
| SMEs’ Performance | Eff1 | I am satisfied with my profit |
| Eff2 | I am satisfied with my return on asset |
| Eff3 | I am satisfied with my net profit |

**Source**: Processed references
